# Supplementary material for: Genetic variants associated with motion sickness point to roles for inner ear development, neurological processes and glucose homeostasis
Source: PubMed Central journal article supplement — Hum Mol Genet. 2015 Jan 26;24(9):2700–8. doi: 10.1093/hmg/ddv028 (PMC4383869; doi:10.1093/hmg/ddv028), 2015-01-26
Supplement: supp_ddv028_ddv028supp.pdf [file supp_ddv028_ddv028supp.pdf]

Table S1. SNPs associated with motion sickness ( $p < 1.0E-05$ ). Alleles are reported in alphabetical order with respect to the positive strand of build 37 of the human genome. The effect is the change per copy of the second allele on a four-point scale of increasing motion sickness. Frequency is the frequency of the alphabetically second allele in the cohort. Frequency is for imputed SNPs unless the genotyped SNP was used in the analysis (those marked with a \*). Quality is imputation  $r^2$  for imputed SNPs, call rate for genotyped SNPs (those marked with a \*).

Table S2. Associations between 35 motion sickness-associated SNPs and six correlated and clinically important phenotypes. N is the number of people with data for motion sickness and PONV, altitude sickness, morning sickness, hay fever, vertigo, or migraines.

Table S3: Sex-specific effects for significant SNPs. Estimated effect sizes for females, males, and their ratio. P-values are for a non-zero interaction term between sex and genotype. SNPs are sorted by increasing p-value.

# Genetic variants associated with motion sickness point to roles for inner ear development, neurological processes, and glucose homeostasis — Supplement

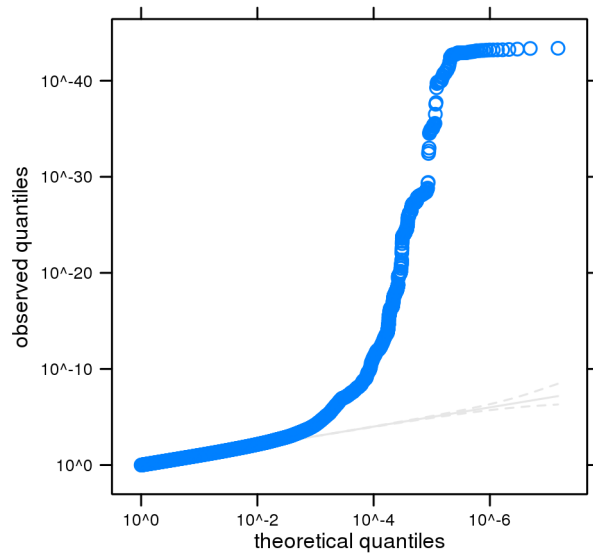

Figure S1: **Quantile-quantile plot.** Observed versus expected  $p$ -values under the null.

# Genetic variants associated with motion sickness point to roles for inner ear development, neurological processes, and glucose homeostasis — Supplement

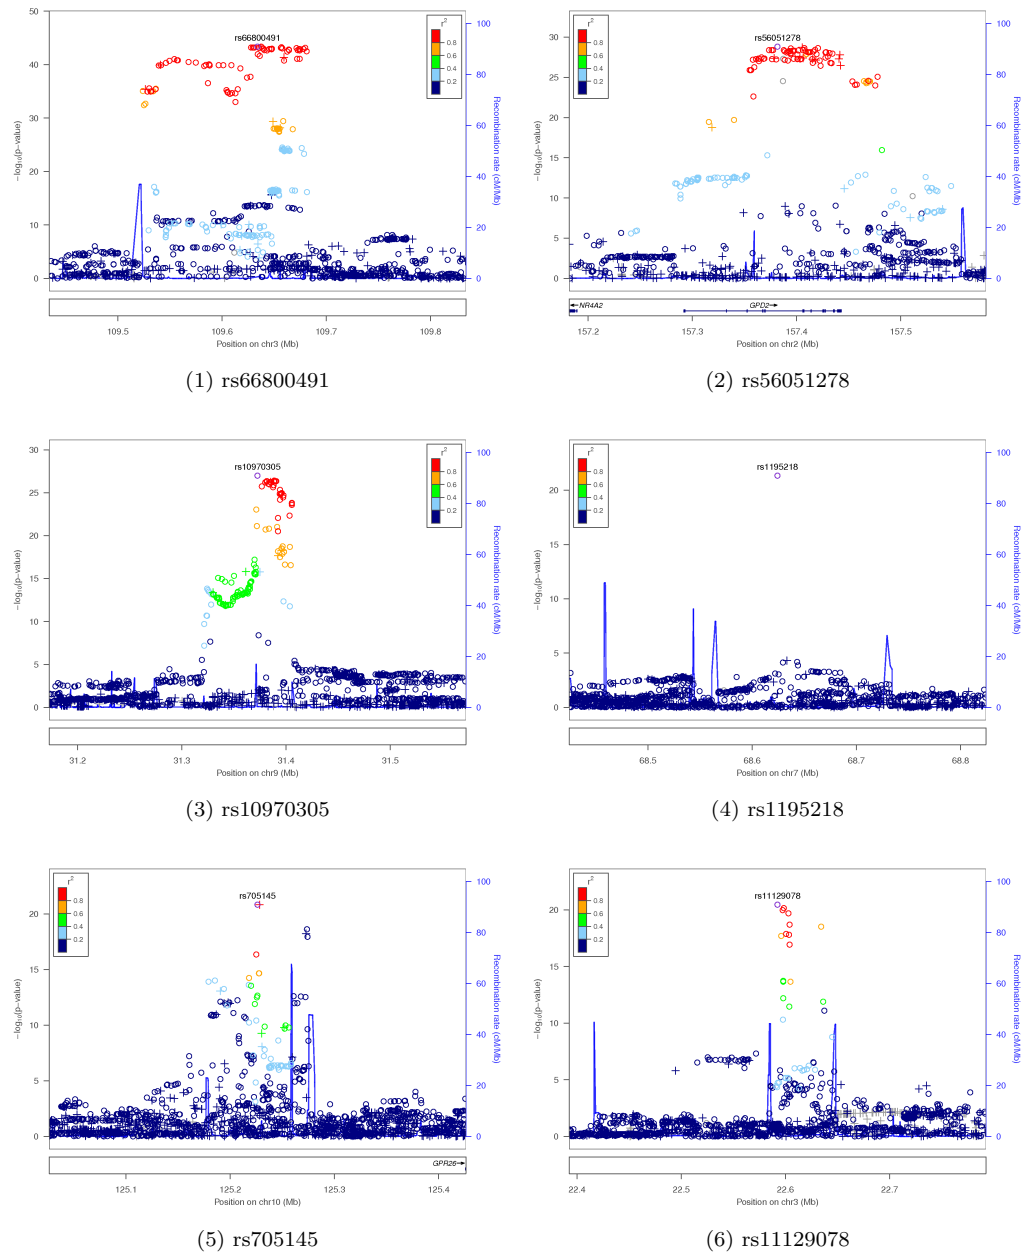

Figure S2: **Region plots for genome-wide significant regions.** SNPs are colored by  $r^2$  with the index SNP (which is labeled). Circles are imputed SNPs, plus signs are genotyped SNPs.

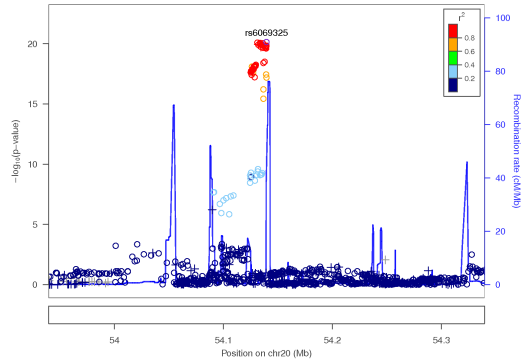

(7) rs6069325

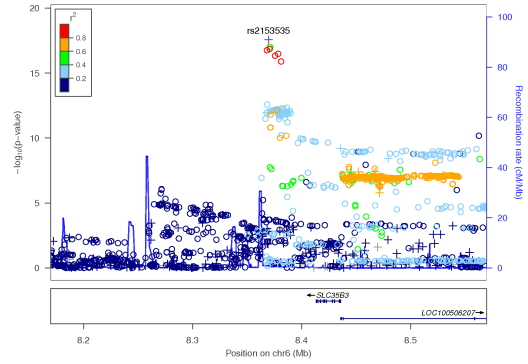

(8) rs2153535

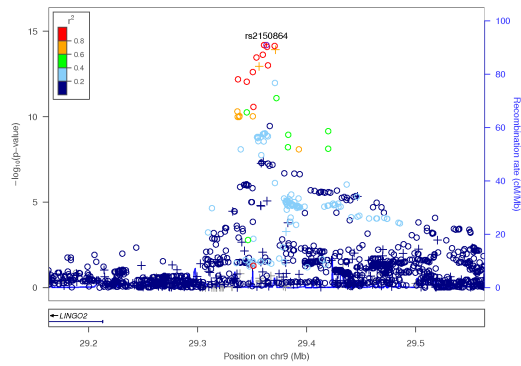

(9) rs2150864

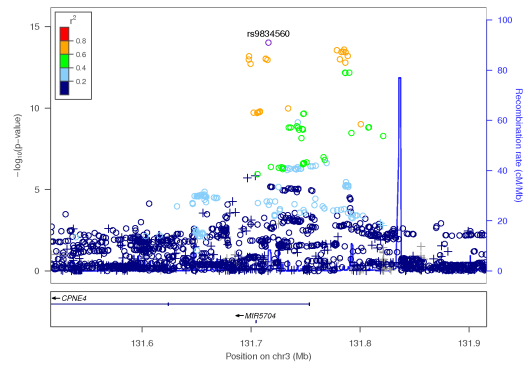

(10) rs9834560

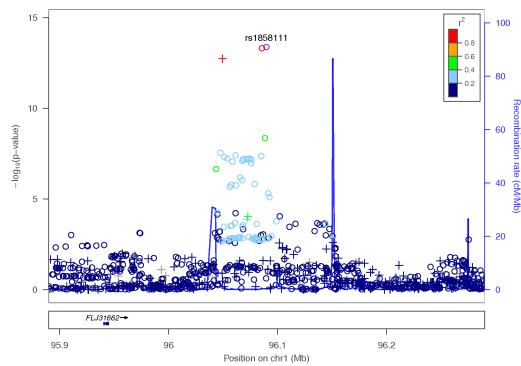

(11) rs1858111

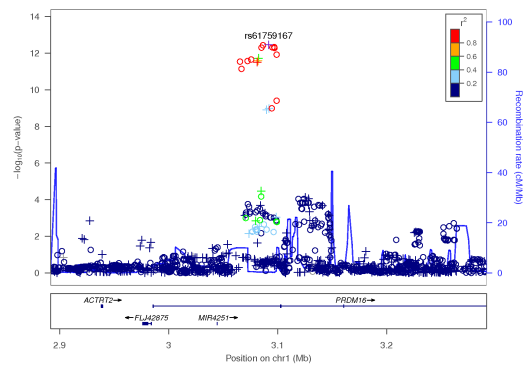

(12) rs61759167

Figure S2: **Region plots for genome-wide significant regions.** SNPs are colored by  $r^2$  with the index SNP (which is labeled). Circles are imputed SNPs, plus signs are genotyped SNPs.

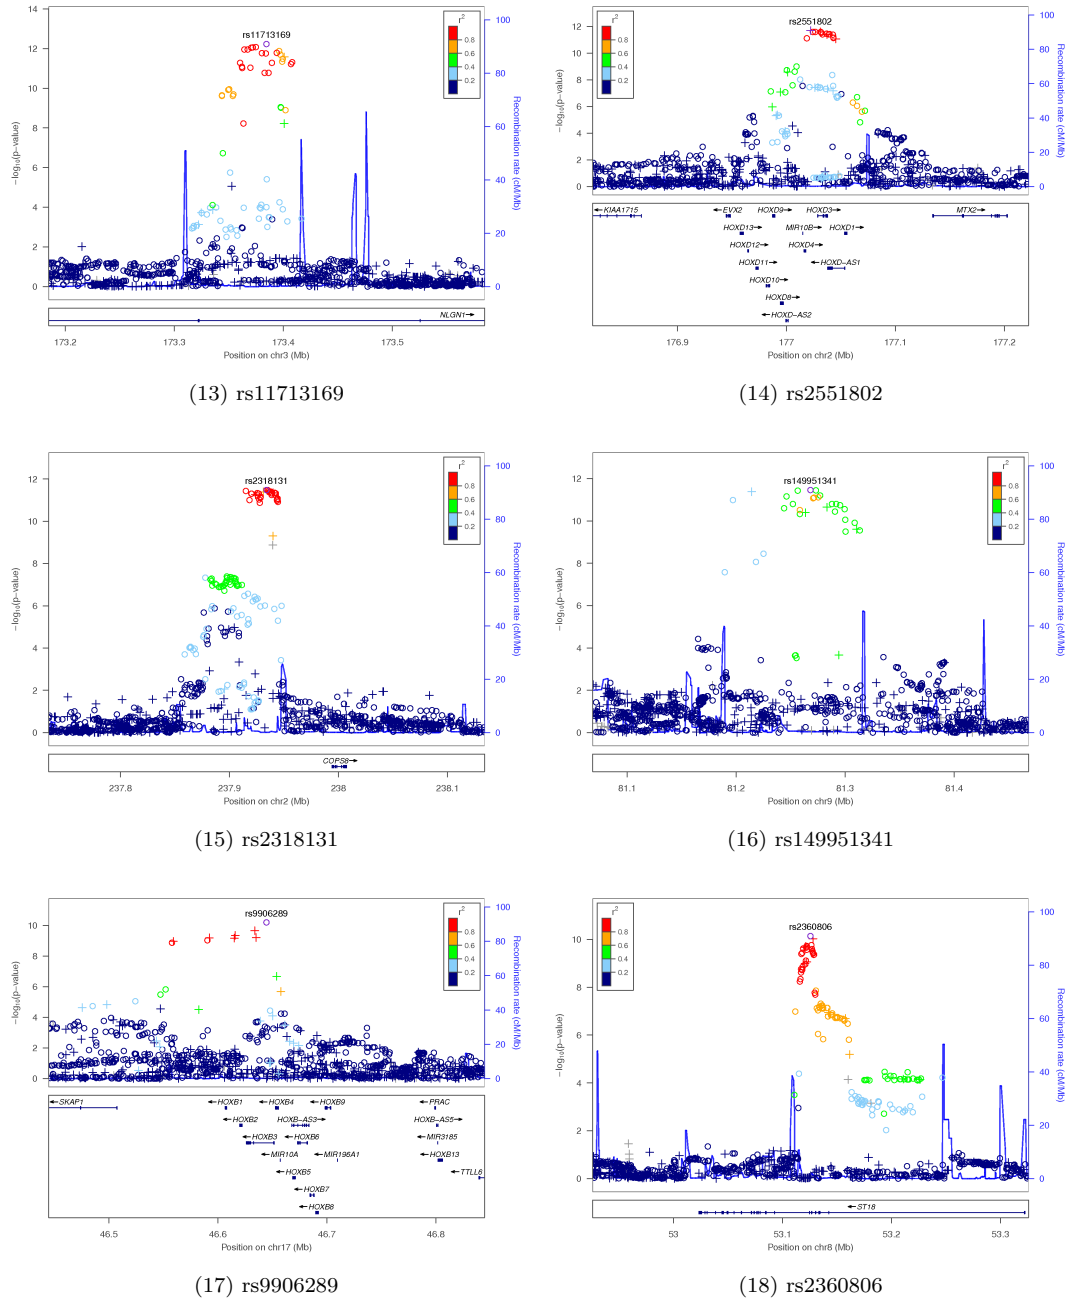

Figure S2: **Region plots for genome-wide significant regions.** SNPs are colored by  $r^2$  with the index SNP (which is labeled). Circles are imputed SNPs, plus signs are genotyped SNPs.

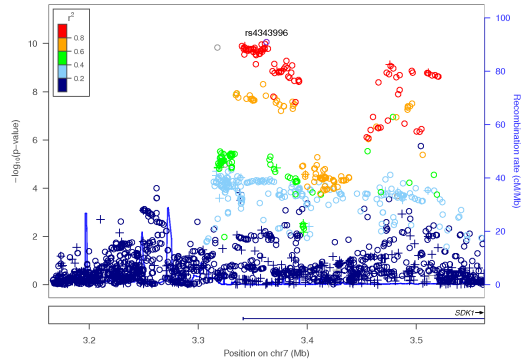

(19) rs4343996

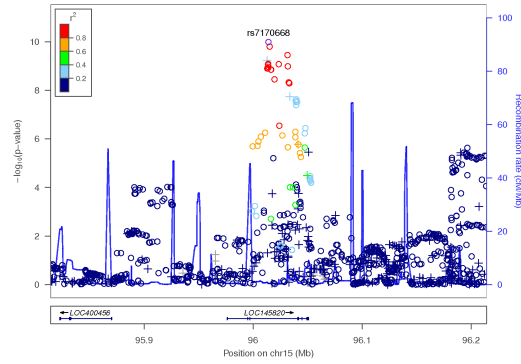

(20) rs7170668

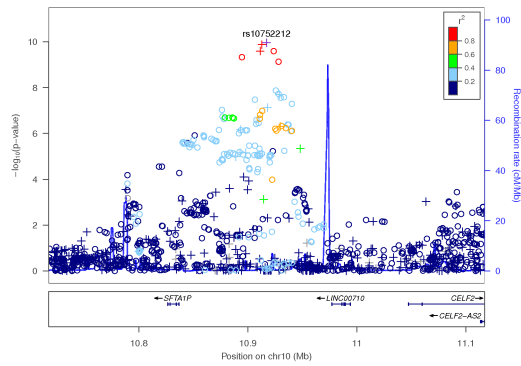

(21) rs10752212

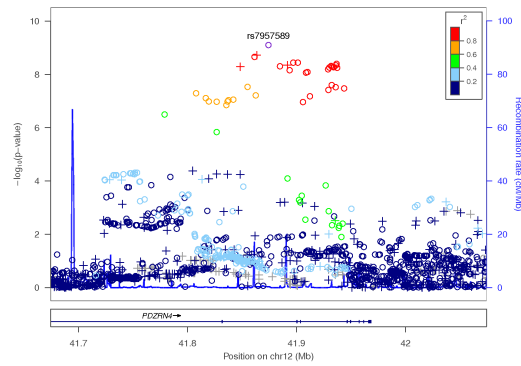

(22) rs7957589

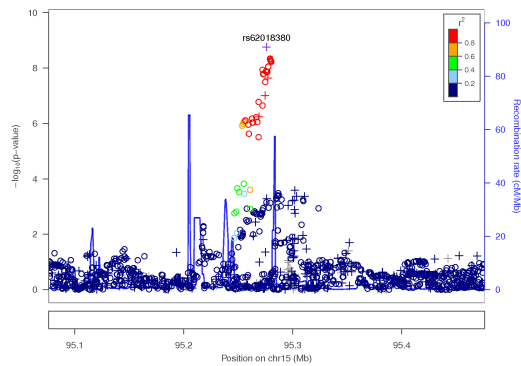

(23) rs62018380

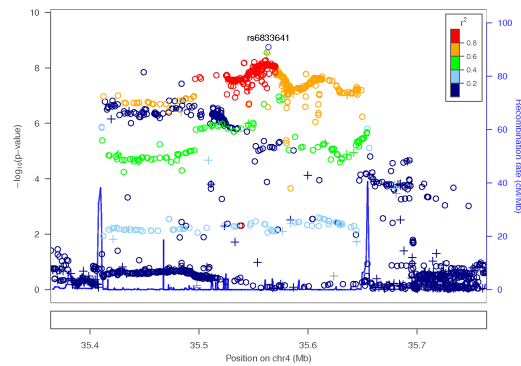

(24) rs6833641

Figure S2: **Region plots for genome-wide significant regions.** SNPs are colored by  $r^2$  with the index SNP (which is labeled). Circles are imputed SNPs, plus signs are genotyped SNPs.

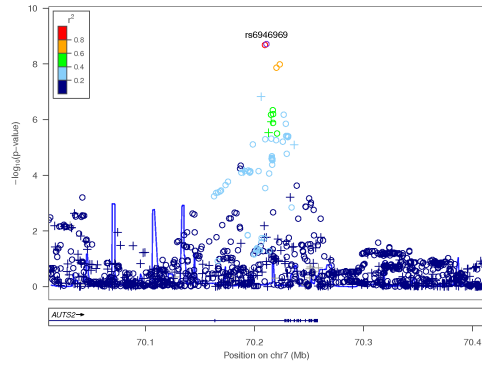

(25) rs6946969

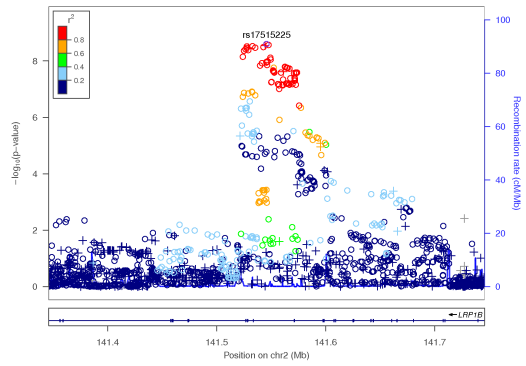

(26) rs17515225

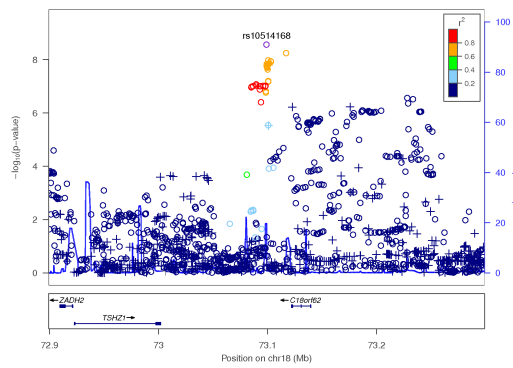

(27) rs10514168

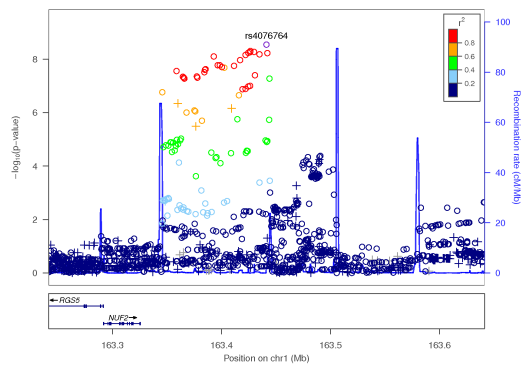

(28) rs4076764

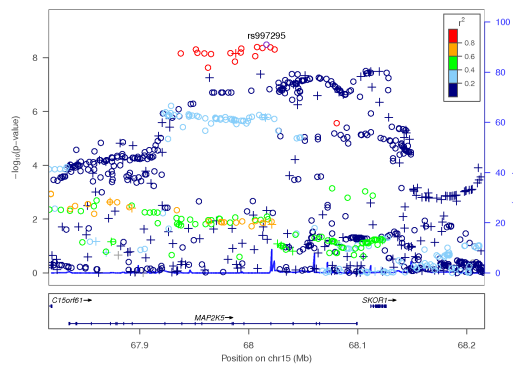

(29) rs997295

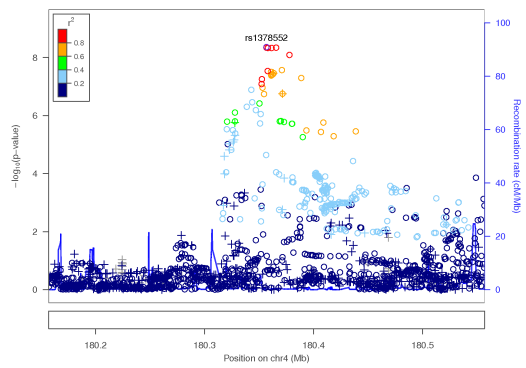

(30) rs1378552

Figure S2: **Region plots for genome-wide significant regions.** SNPs are colored by  $r^2$  with the index SNP (which is labeled). Circles are imputed SNPs, plus signs are genotyped SNPs.

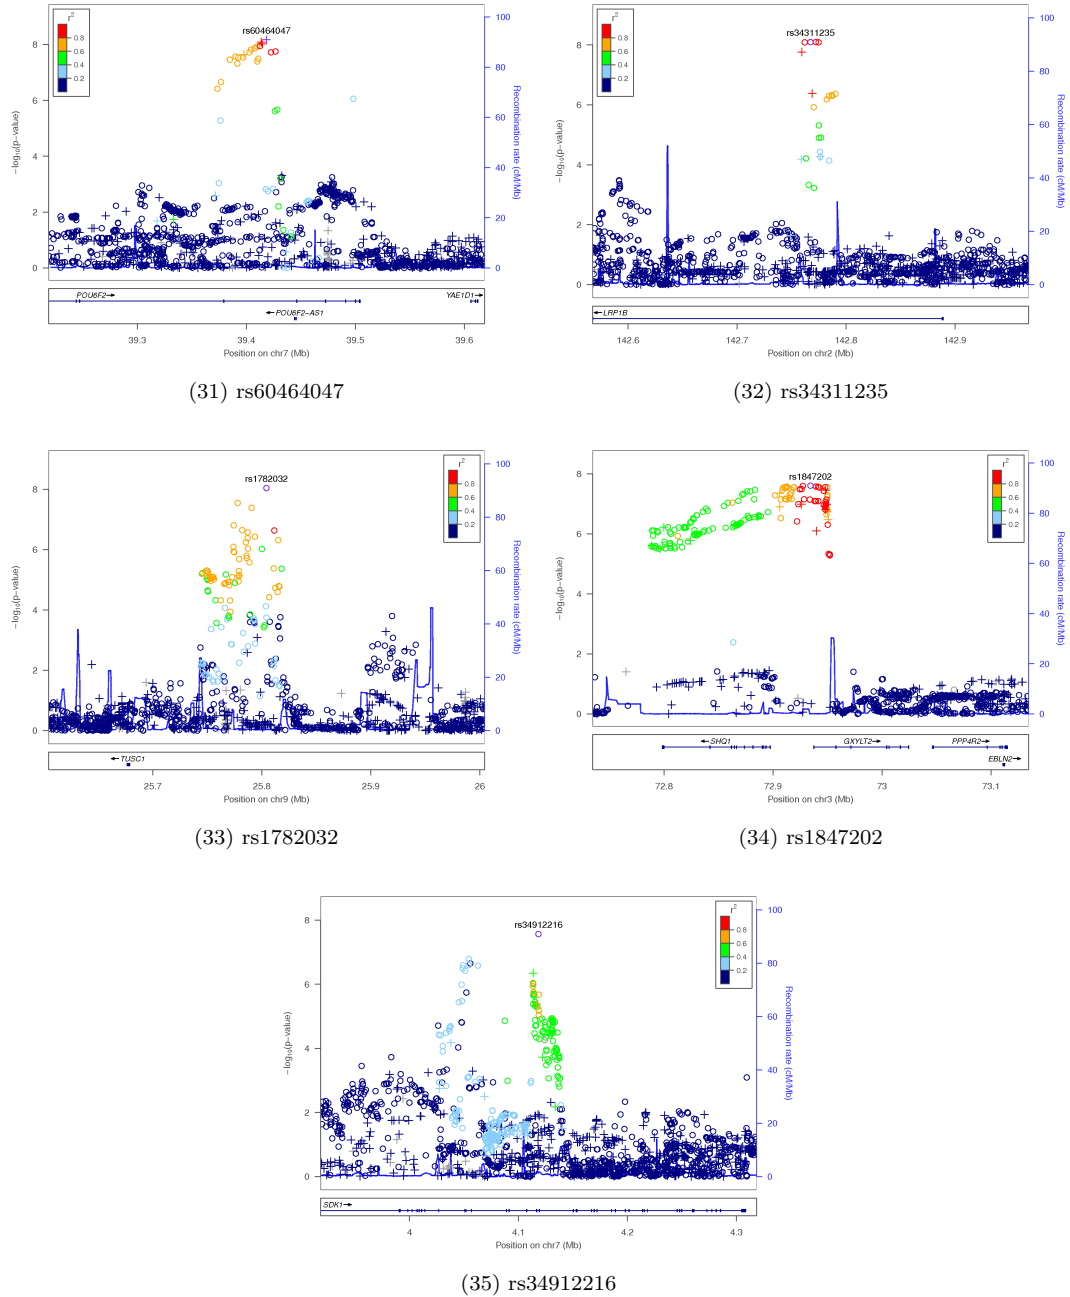

Figure S2: **Region plots for genome-wide significant regions.** SNPs are colored by  $r^2$  with the index SNP (which is labeled). Circles are imputed SNPs, plus signs are genotyped SNPs.
